## Low-Latitude Origins of the Four Phanerozoic Evolutionary Faunas

A. Rojas<sup>1\*</sup>, J. Calatayud<sup>1</sup>, M. Kowalewski<sup>2</sup>, M. Neuman<sup>1</sup>, and M. Rosvall<sup>1</sup>

<sup>1</sup>Integrated Science Lab, Department of Physics, Umeå University,  
SE-901 87 Umeå, Sweden

5      <sup>2</sup>Florida Museum of Natural History, Division of Invertebrate Paleontology, University of  
Florida, Gainesville, FL 32611, USA

\*Correspondence to: [alexis.rojas-briceno@umu.se](mailto:alexis.rojas-briceno@umu.se)

**Abstract:** Sepkoski's hypothesis of Three Great Evolutionary Faunas that dominated  
10 Phanerozoic oceans represents a foundational concept of macroevolutionary research. However,  
the hypothesis lacks spatial information and fails to recognize ecosystem changes in Mesozoic  
oceans. Using a multilayer network representation of fossil occurrences, we demonstrate that  
Phanerozoic oceans sequentially harbored four evolutionary faunas: Cambrian, Paleozoic,  
15 Mesozoic, and Cenozoic. These mega-assemblages all emerged at low latitudes and dispersed  
out of the tropics. The Paleozoic–Mesozoic transition was abrupt, coincident with the Permian  
mass extinction, whereas the Mesozoic–Cenozoic transition was protracted, concurrent with  
gradual ecological shifts posited by the *Mesozoic Marine Revolution*. These findings support the  
notion that long-term ecological changes, historical contingencies, and major geological events  
all have played crucial roles in shaping the evolutionary history of marine animals.

### 20 **One Sentence Summary:**

Network analysis reveals that Phanerozoic oceans harbored four evolutionary faunas with  
variable tempo and underlying causes.

The hypothesis of the Three Great Evolutionary Faunas postulated that the major groups  
of marine animals archived in the Phanerozoic fossil record were distributed non-randomly  
25 through time and could be grouped into Cambrian, Paleozoic and Modern mega-assemblages (1).  
Jack Sepkoski formulated this hypothesis based on a factor analysis of family-level diversity  
within taxonomic classes (2). This hypothesis became a foundational concept of  
macroevolutionary research, used as a framework-setting assumption of studies on large-scale  
trends in diversity (3, 4), extinction (5–7), and evolution of marine animals (8–10). However,  
30 the three-phase model fails to account for ecosystem changes in Mesozoic oceans, which point to  
a later emergence of the modern marine faunas than was predicted by the model (11–13).  
Moreover, the geographic origin, timing, and causative drivers of the major biotic transitions  
between successive evolutionary faunas are still debated (14–16). This lack of clarity raises a  
fundamental question: How does Phanerozoic marine diversity structure into these discrete,  
35 global-scale mega-faunal assemblages that persist over extended intervals of geological time?  
Using a multilayer network framework, we unveiled the dynamic spatiotemporal organization of  
marine life during Phanerozoic times.

In the network analysis employed here (Fig. S1), we aggregated accepted genus-level  
occurrences of the dominant fossil groups of marine invertebrates (trilobites, decapods,

40 brachiopods, bryozoans, corals, echinoderms, and mollusks) (17) from the Paleobiology  
Database (18) into spatially and temporally explicit grid cells. We used the aggregated data to  
generate a multilayer network where each layer represents a geological stage in the geological  
timescale (19) and consists of grid cells and taxa that occur in each stage. The taxa connect both  
45 to stage-specific grid cells through intra-layer links with weights adjusted for sampling effort  
(20) and to grid cells in adjacent stages through inter-layer links (21). The assembled network  
comprises 4,906 spatiotemporal grid cells and 18,297 genera, distributed into 99 stages (Data  
S1). This multilayer network representation simultaneously captures geographical and temporal  
relationships between taxa, which enables integrative spatiotemporal analysis of the Metazoan  
macroevolution.

50 Using the multilevel network clustering algorithm Infomap (21–23), we found that the  
assembled network is best described by four significant supermodules of highly interconnected  
taxa and grid cells (Data S2). These supermodules capture fundamental structure and dynamics  
of the Phanerozoic benthic marine faunas in two ways (Fig. 1). First, the supermodule grid cells  
divided the Phanerozoic rock record into four successive intervals: The Phanerozoic domains.  
55 Second, the supermodule taxa define four partially overlapped sets of marine animals that  
characterize each Phanerozoic domain and sequentially shift dominance patterns over time: The  
four evolutionary faunas. These faunas represent marine mega-assemblages that vary in the  
composition and proportional representation of major animal groups, which we define as those  
taxa that represent  $\geq 5\%$  of the supermodule genera (Fig. S2). Although our analysis identified  
60 four mega-assemblages, in contrast to three assemblages discriminated in the classic analyses  
(1), the classes of marine invertebrates that contribute the most to our Cambrian, Paleozoic, and  
combined Mesozoic—Cenozoic mega-assemblages match those from the hypothesis of the Three  
Great Evolutionary Faunas, suggesting that these macroevolutionary units are unlikely to  
represent an artifact of the factor (12) or network analyses.

65 The Phanerozoic domains are slightly different from standard geological eras (Adjusted  
Mutual Information, AMI = 0.71). They show that Phanerozoic oceans sequentially harbored the  
four evolutionary faunas, as follows (Fig. 1): Cambrian (Fortunian to Paibian, 541–494 Ma),  
Paleozoic (Jiangshanian to Changhsingian, 494–252 Ma), Mesozoic (Induan to Hauterivian, 252–  
129 Ma), and Cenozoic (Barremian to Holocene, 129–0 Ma). However, the three mega-  
70 assemblage shifts that define four evolutionary faunas vary in timing and causative drivers. The  
Cambrian—Paleozoic faunal shift appears to be an abrupt transition at the base of the uppermost  
Cambrian stage (Fig. 2A–C), although the limited number of fossil occurrences from that interval  
prevents a better understanding of the faunal transition (Supplementary Materials and Methods).  
The Paleozoic—Mesozoic faunal shift is also abrupt (Fig. 2C–D); the two consecutive domains  
75 overlap in one geological stage that lasted  $\sim 2.5$  Ma, and the mega-assemblages share a few taxa  
(Jaccard similarity index = 0.03). This faunal transition coincided with the Earth's largest mass  
extinction event (6, 24), which is viewed as the cause of the global shift in ocean life at that time  
(2, 25). In contrast, the Mesozoic—Cenozoic faunal transition is protracted, with a gradual shift  
in dominance among mega-assemblages, which share more taxa (Jaccard similarity index = 0.11)  
80 (Fig. 1), and substantially overlap in geographic space (Fig. 2D–E). In addition, the two  
consecutive domains overlap in two geological stages that lasted  $\sim 8.0$  Ma.

The protracted Mesozoic—Cenozoic biotic transition is reminiscent of the gradual  
Mesozoic restructuring of the global marine ecosystems, which included changes in food-web  
structure, functional ecology of dominant taxa, and increased predation pressure (11, 13). These

85 changes in marine ecosystems started early in the Mesozoic era and continued throughout the  
Cenozoic era (26, 27). However, changes in Mesozoic oceans were particularly notable in the  
mid-Cretaceous (28, 29). Our results suggest that such changes in the global marine ecosystems  
may have been responsible for the gradual emergence of the modern evolutionary fauna.  
However, regardless of the transition mechanism, the gradual emergence of the Cenozoic  
90 evolutionary fauna indicates that modern benthic biota first emerged during the early Mesozoic  
already, but did not become dominant until the mid-Cretaceous (~130 Ma) (Fig. 2A). In this  
way, the quadripartite structuring of the Phanerozoic marine fossil record revealed by multilayer  
network analysis resolves the conflict between the Three Great Evolutionary Faunas and the  
Mesozoic Marine Revolution hypothesis (15), which postulates the gradual diversification of  
95 Sepkoski's modern evolutionary fauna during the late Cretaceous and Cenozoic (11).

The multilayer network framework provides a platform for studying the geographic  
distribution of the evolutionary faunas over time. The spatial distribution of the taxa shows that  
Mesozoic (Fig. 2D) and Cenozoic (Fig. 2E) evolutionary faunas were concentrated preferentially  
in lower latitudes before they became globally dominant by establishing their respective domain.  
100 Taxa from both Paleozoic (Fig. 2C) and Mesozoic (Fig. 2D) evolutionary faunas preferentially  
persisted in low-latitude areas after a new fauna became globally dominant. Furthermore, the  
latitudinal extent of the Phanerozoic domains shows that evolutionary faunas became dominant  
first at low (< 12°, Cambrian, Paleozoic, and Mesozoic) and low-to-mid latitudes (< 40°,  
Cenozoic) and then experienced extratropical spread (Fig. 2A). Overall, these findings are  
105 consistent with the Out of the Tropics hypothesis, which postulates tropical origin, poleward  
dispersal, and low-latitude persistence of the marine taxa (30).

The nested hierarchical structure of the multilayer network of Phanerozoic benthic  
marine faunas suggests that biogeographic structure underlies evolutionary faunas. The  
supermodules identified in the assembled network consist of lower-level modules that capture  
110 internal structure of the faunas. Overall, modules from the second hierarchical level delineate  
shorter temporal units consistent with periods in the geological timescale (AMI = 0.83) (Fig.  
S3A). Moreover, some lower-level modules form geographically coherent units that change over  
time (Fig. S4) (17, 20). We were unable to map such bioregions through the entire Phanerozoic,  
which may reflect resolving limitations of existing data. Nevertheless, the presence of bioregions  
115 suggests that evolutionary faunas scale up from localized geographic areas (Fig. 3; Fig. S4).  
Testing this hypothesis – mapping the complete Phanerozoic marine bioregions in a consistent  
fashion that links them explicitly to evolutionary faunas – will require improved paleontological  
data with finer chronostratigraphic constraints and improved spatial coverage.

Our analysis of the marine fossil record in a multilayer network framework demonstrates  
120 that Phanerozoic oceans sequentially harbored four marine evolutionary faunas, which emerged  
at low latitudes and then persisted as globally dominant mega-assemblages. The major  
transitions between successive evolutionary faunas varied in tempo and underlying causes,  
ranging from abrupt global perturbations to protracted ecological shifts. In addition, we show  
that biogeographic structure underlies the evolutionary faunas in the dynamic organization of the  
125 Phanerozoic marine diversity. Overall, these findings highlight the evolutionary importance of  
historical contingencies and support the notion that long-term ecological interactions, as well as  
global geological perturbations, have played a critical role in the shaping evolutionary history of  
marine animals (16).

130 **References and Notes:**

1. J. J. Sepkoski, A factor analytic description of the Phanerozoic marine fossil record. *Paleobiology*. **7**, 36–53 (1981).
2. J. J. Sepkoski, A kinetic model of Phanerozoic taxonomic diversity. III. Post-Paleozoic families and mass extinctions. *Paleobiology*. **10**, 246–267 (1984).
- 135 3. J. J. Sepkoski, Crustacean biodiversity through the marine fossil record. *Contrib. Zool.* **69**, 213–222 (2000).
4. P. M. Sheehan, History of marine biodiversity. *Geol. J.* **36**, 231–249 (2001).
5. M. L. Droser, D. J. Bottjer, P. M. Sheehan, G. R. McGhee Jr, Decoupling of taxonomic and ecologic severity of Phanerozoic marine mass extinctions. *Geology*. **28**, 675–678 (2000).
- 140 6. H. Song, P. B. Wignall, A. M. Dunhill, Decoupled taxonomic and ecological recoveries from the Permo-Triassic extinction. *Sci. Adv.* **4**, eaat5091 (2018).
7. A. D. Muscente et al., Quantifying ecological impacts of mass extinctions with network analysis of fossil communities. *Proc. Natl. Acad. Sci. U.S.A.* **115**, 5217–5222 (2018).
8. J. M. Adrain, Post-Cambrian Trilobite Diversity and Evolutionary Faunas. *Science*. **280**, 1922–1925 (1998).
- 145 9. J. Sprinkle, T. E. Guensburg, Origin of Echinoderms in the Paleozoic Evolutionary Fauna: The Role of Substrates. *Palaios*. **10**, 437 (1995).
10. M. L. Droser, The Ordovician Radiation: A Follow-up to the Cambrian Explosion? *Integr. Comp. Biol.* **43**, 178–184 (2003).
- 150 11. G. J. Vermeij, The Mesozoic marine revolution: evidence from snails, predators and grazers. *Paleobiology*. **3**, 245–258 (1977).
12. J. Alroy, Are Sepkoski’s evolutionary faunas dynamically coherent? *Evol. Ecol. Res.* **6**, 1–32 (2004).
13. A. M. Bush, G. Hunt, R. K. Bambach, Sex and the shifting biodiversity dynamics of marine animals in deep time. *Proc. Natl. Acad. Sci. U.S.A.* **113**, 14073–14078 (2016).
- 155 14. R. K. Bambach, Classes and adaptive variety: The ecology of diversification in marine faunas through the Phanerozoic in *Phanerozoic Diversity Patterns: Profiles in Macroevolution* (Princeton University Press, 1985), pp. 191–253.
15. J. A. Kitchell, N. Macleod, Macroevolutionary Interpretations of Symmetry and Synchronicity in the Fossil Record. *Science*. **240**, 1190–1193 (1988).
- 160 16. A. I. Miller, Biotic Transitions in Global Marine Diversity. *Science*. **281**, 1157–1160 (1998).
17. Á. T. Kocsis, C. J. Reddin, W. Kiessling, The biogeographical imprint of mass extinctions. *Proc. R. Soc. B.* **285**, 20180232 (2018).
18. S. E. Peters, M. McClennen, The Paleobiology Database application programming interface. *Paleobiology*. **42**, 1–7 (2016).
- 165 19. F. M. Gradstein, J. G. Ogg, A. G. Smith, Eds., A geologic time scale 2004 (Cambridge University Press, Cambridge, UK, 2004).

20. A. Rojas, P. Patarroyo, L. Mao, P. Bengtson, M. Kowalewski, Global biogeography of Albian ammonoids: A network-based approach. *Geology*. **45**, 659–662 (2017).
- 170 21. D. Edler, L. Bohlin, Rosvall, Mapping Higher-Order Network Flows in Memory and Multilayer Networks with Infomap. *Algorithms*. **10**, 112 (2017).
22. M. Rosvall, C. T. Bergstrom, Maps of random walks on complex networks reveal community structure. *Proc. Natl. Acad. Sci. U.S.A.* **105**, 1118–1123 (2008).
- 175 23. M. Rosvall, D. Axelsson, C. T. Bergstrom, The map equation. *Eur. Phys. J. Spec. Top.* **178**, 13–23 (2009).
24. J. L. Penn, C. Deutsch, J. L. Payne, E. A. Sperling, Temperature-dependent hypoxia explains biogeography and severity of end-Permian marine mass extinction. *Science*. **362**, eaat1327 (2018).
25. D. H. Erwin, The End-Permian Mass Extinction. *Annu. Rev. Ecol. Syst.* **21**, 69–91 (1990).
- 180 26. R. M. Leckie, T. J. Bralower, R. Cashman, Oceanic anoxic events and plankton evolution: Biotic response to tectonic forcing during the mid-Cretaceous. *Paleoceanography*. **17**, 1–29 (2002).
27. A. H. Knoll, M. J. Follows, A bottom-up perspective on ecosystem change in Mesozoic oceans. *Proc. R. Soc. B.* **283**, 1755 (2016).
- 185 28. R. K. Bambach, Energetics in the global marine fauna: A connection between terrestrial diversification and change in the marine biosphere. *Geobios*. **32**, 131–144 (1999).
29. A. H. Knoll, Biomineralization and Evolutionary History. *Rev. Mineral. Geochem.* **54**, 329–356 (2003).
- 190 30. D. Jablonski, K. Roy, J. W. Valentine, Out of the Tropics: Evolutionary Dynamics of the Latitudinal Diversity Gradient. *Science*. **314**, 102–106 (2006).

**Acknowledgments:** We thank S. Finnegan and D. Edler for useful discussions, and R. Nawrot for helpful comments on the manuscript. **Funding:** A.R. and M.N. were supported by the Olle Engkvist Byggmästare Foundation. M.R. was supported by the Swedish Research Council, grant 2016-00796. **Author contributions:** A.R. conceived the project. A.R., and M.R. designed the experiments. A.R. performed the network analysis. J.C., A.R., and M.N. performed the robustness assessment. A.R., M.K., and M.R. wrote the manuscript with input from all authors. All authors discussed the results and commented on the manuscript. **Competing interests:** Authors declare no competing interests. **Data and materials availability:** All data is available in the main text or the supplementary materials.

200 **Supplementary Materials:**

Materials and Methods

Figs. S1-S4

Tables S1-S2

Caption for Data S1-S2

205 References (30-39)



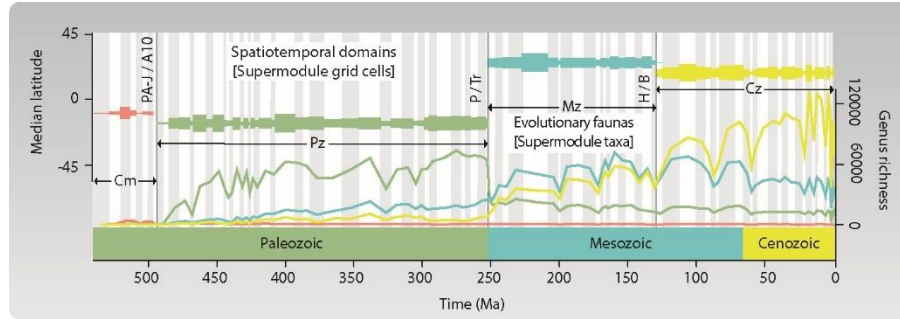

**Figure 1.** Modular configuration of the multilayer network of Phanerozoic benthic marine faunas.

210 The four evolutionary faunas and domains delineated by multilayer network analysis. Lines  
represent the genus richness of each evolutionary fauna. Mega-assemblages shift dominance  
patterns over time, but transitions are either abrupt (Paleozoic—Mesozoic faunal shift) or  
protracted (Mesozoic—Cenozoic faunal shift). Horizontal bars represent the Phanerozoic  
215 domains, with the bar width indicating the number of grid cells. The domains are temporally  
coherent units describing the successive dominance of the four evolutionary faunas.  
Abbreviations: Cambrian (Cm); Paleozoic (Pz); Mesozoic (Mz); and Cenozoic (Cz). Domain  
boundaries: combined Paibian-Jiangshanian—Age10 (PA-J/A10); Permian—Triassic (P/Tr); and  
Hauterivian—Barremian (H/B). Supermodule robustness: Cambrian,  $P_{0.7} = 1.00$ ; Paleozoic,  $P_{0.7} = 0.99$ ;  
Mesozoic,  $P_{0.7} = 0.25$  and  $P_{0.5} = 1.00$ ; and Cenozoic,  $P_{0.7} = 1.00$ .

220

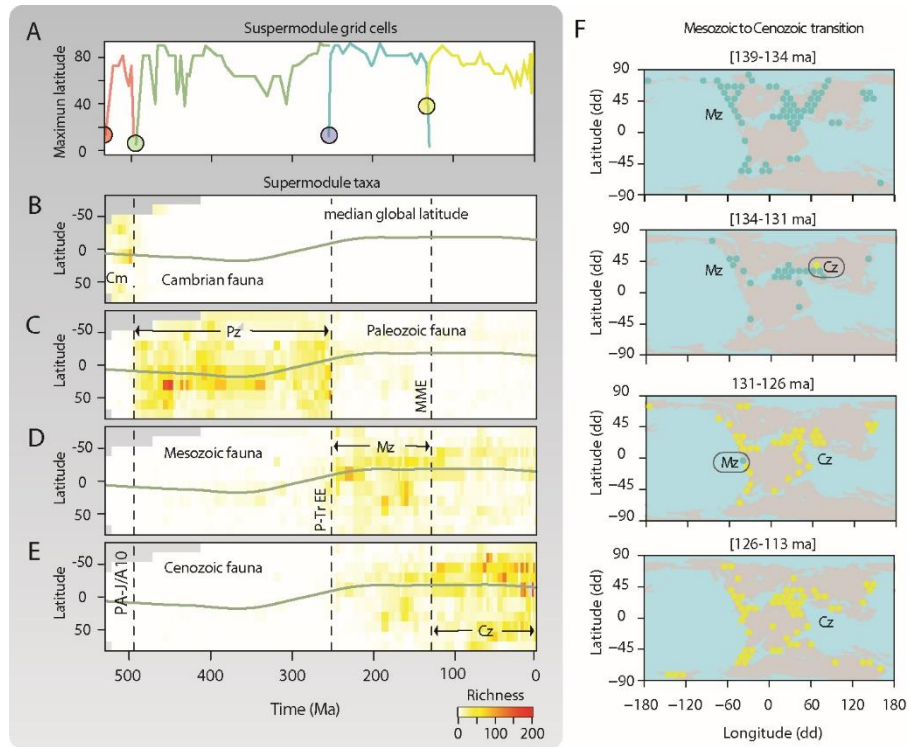

**Figure 2.** Geographic distribution of the four evolutionary faunas over time.

225 (A) Latitudinal extent of the Phanerozoic domains. Lines represent the maximum latitude of the  
grid cells delimiting each domain. The domains emerge at low latitudes and experience rapid  
extratropical spread. (B-E). Genus richness maps of the four evolutionary faunas. Mega-  
assemblage shifts are either abrupt global perturbations (Cambrian—Paleozoic and  
Paleozoic—Mesozoic faunal shifts) or protracted changes with substantial temporal and spatial  
230 overlap (Mesozoic—Cenozoic faunal shift). (F) Maps across the Mesozoic—Cenozoic domain  
transition.

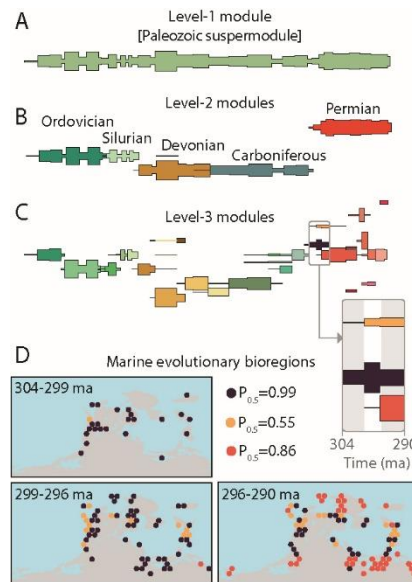

**Figure 3.** Nested hierarchical structure of the multilayer network of Phanerozoic benthic marine faunas.

235 (A) Supermodule. (B) Second hierarchical level. Modules are consistent with geological periods  
(all modules  $P_{0.7} \geq 0.94$ ). (C) Third hierarchical level (all modules  $P_{0.7} \geq 0.95$ ). (D) Bioregions  
around the Carboniferous/Permian boundary (all modules  $P_{0.7} \geq 0.97$ ). Lower-level modules  
delineate geographically coherent units (20) that change throughout time (17). The nested  
240 hierarchical structure of the assembled network suggest that geographic structure underlies the  
evolutionary faunas.
